# Supplementary material for: Change in the incidence of Parkinson’s disease in a large UK primary care database
Source: PubMed Central journal article supplement (PMC8924194; doi:10.1038/s41531-022-00284-0), 2022-03-15
Supplement: 41531_2022_284_MOESM1_ESM.pdf [file 41531_2022_284_MOESM1_ESM.pdf]

## Supplementary materials

### Supplemental Figure 1: Read codes used for case identification.

#### PD diagnosis Read codes

| Read code | Description                                  | Type      |
|-----------|----------------------------------------------|-----------|
| Eu02300   | [X]Dementia in Parkinson's disease           | diagnosis |
| F11x900   | Cerebral degeneration in Parkinson's disease | diagnosis |
| F12..00   | Parkinson's disease                          | diagnosis |
| F12z.00   | Parkinson's disease NOS                      | diagnosis |
| F130300   | Parkinsonism with orthostatic hypotension    | diagnosis |

#### PD diagnosis Read codes and symptom Read codes

| Read code | Description                                      | Type      |
|-----------|--------------------------------------------------|-----------|
| 2944.00   | O/E - muscle rigid - cogwheel                    | symptom   |
| 2944.11   | O/E - cog wheel rigidity                         | symptom   |
| 297A.00   | O/E - Parkinsonian tremor                        | symptom   |
| 2987.00   | O/E -Parkinson flexion posture                   | symptom   |
| 2987.11   | O/E - Parkinson posture                          | symptom   |
| 2994.00   | O/E-festination-Parkinson gait                   | symptom   |
| 2994.11   | O/E - Parkinson gait                             | symptom   |
| A94y100   | Syphilitic parkinsonism                          | diagnosis |
| Eu02300   | [X]Dementia in Parkinson's disease               | diagnosis |
| F11x900   | Cerebral degeneration in Parkinson's disease     | diagnosis |
| F12..00   | Parkinson's disease                              | diagnosis |
| F123.00   | Postencephalitic parkinsonism                    | diagnosis |
| F12X.00   | Secondary parkinsonism, unspecified              | diagnosis |
| F12z.00   | Parkinson's disease NOS                          | diagnosis |
| F130300   | Parkinsonism with orthostatic hypotension        | diagnosis |
| F13z300   | Akinetic rigid syndrome                          | diagnosis |
| Fyu2100   | [X]Other secondary parkinsonism                  | diagnosis |
| Fyu2200   | [X]Parkinsonism in diseases classified elsewhere | diagnosis |
| Fyu2900   | [X]Secondary parkinsonism, unspecified           | diagnosis |

#### 5 classes of antiparkinsonian medications:

Levodopa-containing medications

Dopamine-receptor agonists

Amantadine

Monoamine oxidase-B inhibitors-MAOB-I (rasagiline and selegiline hydrochloride)

Catechol-O-methyl transferase inhibitors-COMT-I (entacapone and tolcapone)

**Supplemental Figure 2:** Four case definitions using PD diagnosis Read codes, Symptom Read codes and Treatment codes (drug codes)

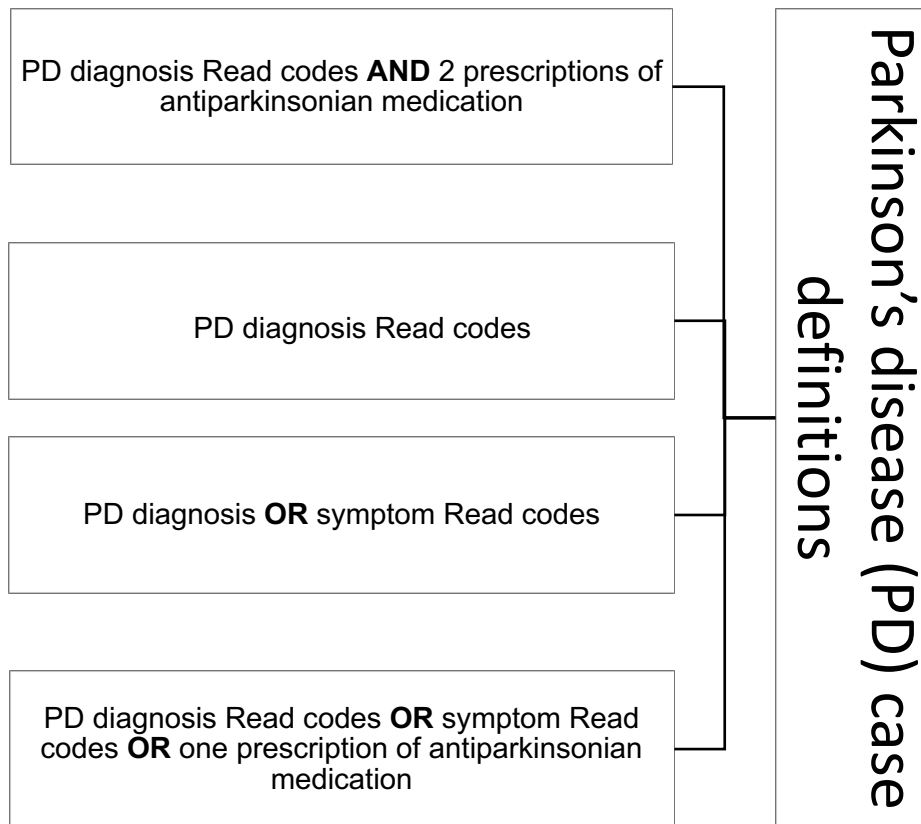

**Supplemental Table 1:** Incidence of Parkinson's disease between 2006 and 2016 by age, gender, social deprivation, calendar year and region using the strictest (most specific) case definition (diagnosis Read codes AND at least 2 prescriptions of any antiparkinsonian medication).

|                          | Number of cases | Person-years (100,000) | Incidence of PD Rate per 100,000 (95% CI) | Adjusted *IRR (95% CI) |
|--------------------------|-----------------|------------------------|-------------------------------------------|------------------------|
| <b>Overall</b>           | 10104           |                        | 57 (56-58)                                |                        |
| <b>Age, years</b>        |                 |                        |                                           |                        |
| 50-54                    | 294             | 33.60                  | 8.75 (7.80-9.81)                          | (Reference)            |
| 55-59                    | 497             | 30.68                  | 16.20 (14.84-17.69)                       | 1.86 (1.60-2.16)       |
| 60-64                    | 892             | 29.15                  | 30.60 (28.66-32.68)                       | 3.57 (3.11-4.09)       |
| 65-69                    | 1435            | 25.02                  | 57.36 (54.47-60.40)                       | 6.65 (5.84-7.58)       |
| 70-74                    | 1971            | 19.90                  | 99.05 (94.77-103.52)                      | 11.62 (10.22-13.20)    |
| 75-80                    | 2220            | 16.05                  | 138.36 (132.72-144.24)                    | 16.46 (14.50-18.69)    |
| 80-84                    | 1678            | 11.75                  | 142.85 (136.17-149.85)                    | 17.26 (15.17-19.65)    |
| 85-89                    | 874             | 7.06                   | 123.78 (115.84-132.27)                    | 15.30 (13.33-17.57)    |
| 90-94                    | 214             | 2.88                   | 74.42 (65.09-85.09)                       | 9.77 (8.14-11.73)      |
| 95+                      | 29              | 0.81                   | 35.88 (24.93-51.63)                       | 4.65 (3.11-6.96)       |
| <b>Sex</b>               |                 |                        |                                           |                        |
| Male                     | 6135            | 83.83                  | 73.18 (71.34-75.04)                       | (Reference)            |
| Female                   | 3969            | 93.05                  | 42.66 (41.35-44.00)                       | 0.52 (0.50-0.55)       |
| <b>Townsend quintile</b> |                 |                        |                                           |                        |
| 1                        | 2811            | 45.36                  | 61.97 (59.72-64.30)                       | (Reference)            |
| 2                        | 2320            | 39.87                  | 58.19 (55.87-60.61)                       | 0.91 (0.86-0.97)       |
| 3                        | 1901            | 34.22                  | 55.55 (53.11-58.10)                       | 0.88 (0.82-0.93)       |
| 4                        | 1441            | 27.13                  | 53.12 (50.45-55.93)                       | 0.83 (0.78-0.89)       |
| 5 (Most deprived)        | 895             | 17.28                  | 51.80 (48.52-55.30)                       | 0.82 (0.76-0.89)       |
| Missing                  | 736             | 13.02                  | 56.53 (52.59-60.76)                       |                        |
| <b>Year</b>              |                 |                        |                                           |                        |
| 2006                     | 961             | 15.91                  | 60.42 (56.72-64.36)                       | (Reference)            |
| 2007                     | 990             | 16.47                  | 60.12 (56.48-63.97)                       | 0.98 (0.90-1.08)       |
| 2008                     | 1070            | 16.89                  | 63.36 (59.68-67.27)                       | 1.05 (0.96-1.14)       |
| 2009                     | 1035            | 17.10                  | 60.54 (56.97-64.35)                       | 0.97 (0.88-1.06)       |
| 2010                     | 994             | 16.87                  | 58.93 (55.38-62.72)                       | 0.94 (0.86-1.03)       |
| 2011                     | 975             | 17.20                  | 56.70 (53.25-60.37)                       | 0.91 (0.83-1.00)       |
| 2012                     | 999             | 17.43                  | 57.32 (53.87-60.98)                       | 0.93 (0.85-1.02)       |
| 2013                     | 953             | 17.02                  | 56.00 (52.55-59.67)                       | 0.90 (0.82-0.98)       |
| 2014                     | 949             | 16.19                  | 58.62 (55.00-62.47)                       | 0.93 (0.85-1.02)       |
| 2015                     | 681             | 14.05                  | 48.46 (44.95-52.23)                       | 0.76 (0.69-0.84)       |
| 2016                     | 497             | 11.77                  | 42.24 (38.69-46.12)                       | 0.67 (0.60-0.75)       |
| <b>Region</b>            |                 |                        |                                           |                        |
| Wales                    | 1002            | 20.03                  | 50.02 (47.02-53.22)                       | (Reference)            |
| East Midlands            | 197             | 3.65                   | 53.99 (46.95-62.08)                       | 0.98 (0.82-1.19)       |
| East of England          | 623             | 9.60                   | 64.90 (60.00-70.20)                       | 1.22 (1.07-1.39)       |
| London                   | 1002            | 17.16                  | 58.40 (54.90-62.13)                       | 1.21 (1.08-1.35)       |
| North East               | 212             | 3.62                   | 58.60 (51.22-67.05)                       | 1.17 (0.97-1.41)       |
| North West               | 918             | 16.88                  | 54.37 (50.97-58.01)                       | 1.07 (0.95-1.20)       |
| Northern Ireland         | 500             | 7.25                   | 69.00 (63.21-75.32)                       | 1.46 (1.28-1.68)       |
| Scotland                 | 1526            | 28.95                  | 52.71 (50.13-55.43)                       | 1.15 (1.04-1.27)       |
| South Central            | 1121            | 18.84                  | 59.50 (56.12-63.01)                       | 1.13 (1.01-1.26)       |
| South East Coast         | 1194            | 18.58                  | 64.25 (60.71-68.00)                       | 1.24 (1.11-1.38)       |
| South West               | 871             | 14.64                  | 59.50 (55.67-63.58)                       | 1.09 (0.97-1.22)       |
| West Midlands            | 761             | 14.32                  | 53.13 (49.49-57.04)                       | 1.01 (0.89-1.14)       |
| Yorkshire & Humber       | 177             | 3.36                   | 52.65 (45.44-61.01)                       | 1.02 (0.84-1.25)       |

\*IRR adjusted for age, gender, year, Townsend quintile and region.

**Supplemental Table 2:** Incidence of Parkinson's disease between 2006 and 2016 by age, gender, social deprivation calendar year and region using diagnosis Read codes.

|                          | Number of cases | Person-years (100,000) | Incidence of PD Rate per 100,000 (95% CI) | Adjusted *IRR (95% CI) |
|--------------------------|-----------------|------------------------|-------------------------------------------|------------------------|
| <b>Overall</b>           | 12336           |                        | 70 (95% CI 69-71)                         |                        |
| <b>Age band, years</b>   |                 |                        |                                           |                        |
| 50-54                    | 330             | 33.60                  | 9.82 (8.81-10.94)                         | (Reference)            |
| 55-59                    | 573             | 30.68                  | 18.67 (17.21-20.27)                       | 1.89 (1.64-2.17)       |
| 60-64                    | 1043            | 29.14                  | 35.79 (33.68-38.01)                       | 3.69 (3.24-4.19)       |
| 65-69                    | 1653            | 25.01                  | 66.09 (63.98-69.35)                       | 6.77 (5.98-7.65)       |
| 70-74                    | 2286            | 19.89                  | 114.92 (110.31-119.73)                    | 11.94 (10.59-13.46)    |
| 75-80                    | 2704            | 16.03                  | 168.64 (162.41-175.12)                    | 17.77 (15.78-20.01)    |
| 80-84                    | 2158            | 11.73                  | 183.95 (176.35-191.88)                    | 19.74 (17.49-22.27)    |
| 85-89                    | 1214            | 7.05                   | 172.39 (162.97-182.36)                    | 18.97 (16.70-21.53)    |
| 90-94                    | 334             | 2.87                   | 116.42 (104.58-129.60)                    | 13.24 (11.30-15.52)    |
| 95+                      | 41              | 0.81                   | 50.83 (37.42-69.03)                       | 5.85 (4.16-8.24)       |
| <b>Sex</b>               |                 |                        |                                           |                        |
| Male                     | 7423            | 83.80                  | 88.58 (86.59-90.62)                       | (Reference)            |
| Female                   | 4913            | 93.01                  | 52.83 (51.38-54.33)                       | 0.53 (0.51-0.55)       |
| <b>Townsend quintile</b> |                 |                        |                                           |                        |
| 1                        | 3349            | 83.80                  | 73.84 (71.38-76.38)                       | (Reference)            |
| 2                        | 2837            | 93.01                  | 71.19 (68.62-73.85)                       | 0.93 (0.89-0.98)       |
| 3                        | 2309            | 83.80                  | 67.52 (64.82-70.33)                       | 0.89 (0.84-0.94)       |
| 4                        | 1801            | 93.01                  | 66.42 (63.4-69.56)                        | 0.87 (0.82-0.92)       |
| 5 (Most deprived)        | 1127            | 83.80                  | 65.26 (61.56-69.19)                       | 0.86 (0.81-0.93)       |
| Missing                  | 913             | 93.01                  | 70.15 (65.75-74.85)                       |                        |
| <b>Year</b>              |                 |                        |                                           |                        |
| 2006                     | 1174            | 15.90                  | 73.90 (69.79-78.24)                       | (Reference)            |
| 2007                     | 1193            | 16.46                  | 72.46 (68.46-76.69)                       | 0.97 (0.90-1.06)       |
| 2008                     | 1253            | 16.88                  | 74.22 (70.23-78.45)                       | 1.00 (0.92-1.09)       |
| 2009                     | 1227            | 17.09                  | 71.80 (67.89-75.93)                       | 0.94 (0.87-1.02)       |
| 2010                     | 1132            | 16.86                  | 67.14 (63.34-71.17)                       | 0.88 (0.81-0.96)       |
| 2011                     | 1137            | 17.19                  | 66.14 (62.41-70.10)                       | 0.88 (0.81-0.95)       |
| 2012                     | 1212            | 17.42                  | 69.56 (65.75-73.59)                       | 0.91 (0.84-0.99)       |
| 2013                     | 1164            | 17.01                  | 68.42 (64.60-72.47)                       | 0.89 (0.82-0.97)       |
| 2014                     | 1146            | 16.18                  | 70.81 (66.83-75.03)                       | 0.93 (0.85-1.01)       |
| 2015                     | 910             | 14.05                  | 64.77 (60.70-69.12)                       | 0.84 (0.77-0.92)       |
| 2016                     | 788             | 11.75                  | 67.00 (62.49-71.85)                       | 0.85 (0.77-0.94)       |
| <b>Region</b>            |                 |                        |                                           |                        |
| Wales                    | 1225            | 20.02                  | 61.20 (57.80-64.70)                       | (Reference)            |
| East Midlands            | 249             | 3.64                   | 68.30 (60.30-77.30)                       | 1.08 (0.91-1.28)       |
| East of England          | 755             | 9.60                   | 78.70(73.30-84.50)                        | 1.25 (1.11-1.42)       |
| London                   | 1225            | 17.15                  | 71.40 (67.50-75.60)                       | 1.23 (1.11-1.36)       |
| North East               | 258             | 3.63                   | 71.40 (63.20-80.60)                       | 1.19 (1.00-1.42)       |
| North West               | 1124            | 16.88                  | 66.60 (62.80-70.60)                       | 1.10 (0.99-1.23)       |
| Northern Ireland         | 587             | 7.24                   | 81.00 (74.70-87.90)                       | 1.42 (1.25-1.61)       |
| Scotland                 | 1893            | 28.94                  | 65.40 (62.50-68.40)                       | 1.16 (1.06-1.27)       |
| South Central            | 1373            | 18.83                  | 72.90 (69.20-76.90)                       | 1.16 (1.04-1.28)       |
| South East Coast         | 1414            | 18.58                  | 76.10 (72.20-80.20)                       | 1.22 (1.10-1.35)       |
| South West               | 1069            | 14.63                  | 73.00 (68.80-77.60)                       | 1.12 (1.01-1.25)       |
| West Midlands            | 936             | 14.2                   | 65.40 (61.30-69.70)                       | 1.05 (0.94-1.18)       |
| Yorkshire & Humber       | 228             | 3.3                    | 67.90 (59.60-77.30)                       | 1.12 (0.94-1.35)       |

\*IRR adjusted for age, gender, year, Townsend quintile and region.

**Supplemental Table 3:** Incidence of Parkinson's disease between 2006 and 2016 by age, gender, social deprivation, calendar year and region using diagnosis Read codes OR symptom Read codes.

|                          | Number of cases | Person-years (100,000) | Incidence of PD Rate per 100,000 (95% CI) | Adjusted *IRR (95% CI) |
|--------------------------|-----------------|------------------------|-------------------------------------------|------------------------|
| <b>Overall</b>           | 13173           |                        | 75(73-76)                                 |                        |
| <b>Age, years</b>        |                 |                        |                                           |                        |
| 50-54                    | 353             | 33.60                  | 10.51 (9.47-11.66)                        | (Reference)            |
| 55-59                    | 604             | 30.68                  | 19.69 (18.18-21.32)                       | 1.87 (1.63-2.14)       |
| 60-64                    | 1101            | 29.14                  | 37.79 (35.62-40.09)                       | 3.65 (3.23-4.14)       |
| 65-69                    | 1755            | 25.0                   | 70.19 (66.98-73.55)                       | 6.78 (6.03-7.65)       |
| 70-74                    | 2417            | 19.88                  | 121.57 (116.82-126.52)                    | 11.88 (10.58-13.35)    |
| 75-79                    | 2853            | 16.02                  | 178.07 (171.65-184.73)                    | 17.64 (15.72-19.80)    |
| 80-84                    | 2336            | 11.72                  | 199.34 (191.42-207.59)                    | 20.17 (17.95-22.67)    |
| 85-89                    | 1327            | 7.04                   | 188.54 (178.66-198.96)                    | 19.47 (17.23-22.02)    |
| 90-94                    | 375             | 2.86                   | 130.90 (118.30-144.84)                    | 14.13 (12.14-16.44)    |
| 95+                      | 52              | 0.81                   | 64.52 (49.17-84.67)                       | 7.01 (5.16-9.52)       |
| <b>Sex</b>               |                 |                        |                                           |                        |
| Male                     | 7908            | 83.76                  | 94.41 (92.35-96.51)                       | (Reference)            |
| Female                   | 5265            | 92.98                  | 56.63 (55.12-58.18)                       | 0.53 (0.51-0.55)       |
| <b>Townsend quintile</b> |                 |                        |                                           |                        |
| 1                        | 3548            | 45.34                  | 78.25 (75.72-80.87)                       | (Reference)            |
| 2                        | 2994            | 39.84                  | 75.16 (72.51-77.90)                       | 0.93 (0.88-0.98)       |
| 3                        | 2473            | 34.19                  | 72.32 (69.53-75.22)                       | 0.90 (0.85-0.94)       |
| 4                        | 1949            | 27.10                  | 71.91 (68.79-75.18)                       | 0.88 (0.83-0.94)       |
| 5 (Most deprived)        | 1232            | 17.26                  | 71.39 (67.51-75.49)                       | 0.89 (0.83-0.95)       |
| Missing                  | 977             | 13.01                  | 75.09 (70.53-79.95)                       |                        |
| <b>Year</b>              |                 |                        |                                           |                        |
| 2006                     | 1274            | 15.89                  | 80.16 (75.87-84.68)                       | (Reference)            |
| 2007                     | 1286            | 16.46                  | 78.14 (73.99-82.53)                       | 0.97 (0.89-1.05)       |
| 2008                     | 1357            | 16.87                  | 80.42 (76.26-84.82)                       | 1.00 (0.93-1.09)       |
| 2009                     | 1329            | 17.08                  | 77.81 (73.73-82.10)                       | 0.94 (0.87-1.02)       |
| 2010                     | 1214            | 16.85                  | 72.09 (68.1-76.20)                        | 0.88 (0.81-0.95)       |
| 2011                     | 1231            | 17.18                  | 71.64 (67.75-75.75)                       | 0.88 (0.81-0.95)       |
| 2012                     | 1286            | 17.42                  | 73.84 (69.91-77.98)                       | 0.90 (0.83-0.97)       |
| 2013                     | 1226            | 17.01                  | 72.09 (68.17-76.24)                       | 0.86 (0.80-0.94)       |
| 2014                     | 1205            | 16.18                  | 74.49 (70.39-78.81)                       | 0.90 (0.83-0.98)       |
| 2015                     | 954             | 14.04                  | 67.93 (63.79-72.38)                       | 0.81 (0.74-0.89)       |
| 2016                     | 811             | 11.76                  | 68.98 (64.39-73.89)                       | 0.81 (0.74-0.89)       |
| <b>Region</b>            |                 |                        |                                           |                        |
| Wales                    | 1305            | 20.0                   | 65.20 (61.76-68.83)                       | (Reference)            |
| East Midlands            | 271             | 3.60                   | 74.33 (65.99-83.73)                       | 1.09 (0.92-1.29)       |
| East of England          | 820             | 10.0                   | 85.50 (79.85-91.56)                       | 1.27 (1.13-1.43)       |
| London                   | 1310            | 17.1                   | 76.43 (72.40-80.68)                       | 1.23 (1.11-1.36)       |
| North East               | 275             | 3.60                   | 76.09 (67.60-85.63)                       | 1.19 (1.00-1.42)       |
| North West               | 1216            | 16.9                   | 72.08 (68.14-76.25)                       | 1.12 (0.99-1.24)       |
| Northern Ireland         | 612             | 7.20                   | 84.64 (78.20-91.61)                       | 1.39 (1.22-1.58)       |
| Scotland                 | 2021            | 28.9                   | 69.86 (66.88-72.98)                       | 1.16 (1.06-1.27)       |
| South Central            | 1475            | 18.8                   | 78.34 (74.46-82.46)                       | 1.17 (1.05-1.29)       |
| South East Coast         | 1488            | 18.6                   | 80.12 (76.15-84.30)                       | 1.20 (1.08-1.33)       |
| South West               | 1149            | 14.6                   | 78.55 (74.13-83.22)                       | 1.13 (1.02-1.26)       |
| West Midlands            | 980             | 14.3                   | 68.48 (64.32-72.89)                       | 1.04 (0.93-1.16)       |
| Yorkshire & Humber       | 250             | 3.40                   | 74.45 (65.76-84.27)                       | 1.14 (0.95-1.36)       |

\*IRR adjusted for age, gender, year, Townsend quintile and region

**Supplemental Table 4:** Comparing incidence rates (per 100,000 PYAR) of Parkinson’s disease by age-group (2011-2015) with results of the Parkinson’s UK study using similar case definitions (diagnostic Read codes).

| <b>THIN</b> |       |      |              |                            |              |              | <b>CPRD</b> |       |      |              |                            |              |              |
|-------------|-------|------|--------------|----------------------------|--------------|--------------|-------------|-------|------|--------------|----------------------------|--------------|--------------|
| Gender      | Age   | N    | Person years | Incidence Rate per 100,000 | 95% CI lower | 95% CI Upper | Gender      | Age   | N    | Person years | Incidence Rate per 100,000 | 95% CI lower | 95% CI Upper |
| All         | 50-54 | 335  | 33.9         | 9.9                        | 8.9          | 11.0         | All         | 50-54 | 134  | 15.8         | 9.1                        | 7.6          | 10.7         |
| All         | 55-59 | 581  | 30.9         | 18.8                       | 17.3         | 20.3         | All         | 55-59 | 232  | 14.8         | 18.2                       | 15.9         | 20.7         |
| All         | 60-64 | 1057 | 29.4         | 35.9                       | 33.8         | 38.2         | All         | 60-64 | 398  | 11.9         | 33.5                       | 30.3         | 37.0         |
| All         | 65-69 | 1662 | 25.3         | 65.7                       | 62.7         | 69.0         | All         | 65-69 | 714  | 11.5         | 62.3                       | 57.8         | 67.1         |
| All         | 70-74 | 2303 | 20.1         | 114.6                      | 110.0        | 119.3        | All         | 70-74 | 969  | 8.5          | 113.4                      | 106.3        | 120.7        |
| All         | 75-79 | 2731 | 16.2         | 168.6                      | 162.4        | 175.1        | All         | 75-79 | 1207 | 7.1          | 173.5                      | 163.9        | 183.6        |
| All         | 80-84 | 2170 | 11.8         | 183.2                      | 175.6        | 191.1        | All         | 80-84 | 1032 | 5.3          | 195.5                      | 183.7        | 207.8        |
| All         | 85-89 | 1228 | 7.1          | 172.7                      | 163.3        | 182.6        | All         | 85-89 | 615  | 3.3          | 186.3                      | 171.9        | 207.1        |
| All         | 90-94 | 337  | 2.9          | 116.5                      | 104.7        | 129.6        | All         | 90-94 | 179  | 1.5          | 115.1                      | 98.9         | 133.3        |
| All         | 95-99 | 41   | 0.8          | 50.4                       | 37.1         | 68.5         | All         | 95-99 | NA   | NA           | NA                         | NA           | NA           |

CI Confidence Interval
